# Supplementary material for: Cocrystals/salt of 1-naphthaleneacetic acid and utilizing Hirshfeld surface calculations for acid–aminopyrimidine synthons
Source: Royal Society of Chemistry journal article supplement (doi:10.1039/d0ce00106f), 2020-01-01
Supplement: d0ce00106f1.pdf [file d0ce00106f1.pdf]

## Electronic Supplementary Information

### Cocrystals/salt of 1-naphthalene acetic acid and utilizing Hirshfeld surface calculations for acid-aminopyrimidine synthon

Utsav Garg<sup>a</sup>, Yasser Azim<sup>\*a</sup>, Aranya Kar<sup>b</sup>, Chullikkattil P. Pradeep<sup>b</sup>

<sup>a</sup>Department of Applied Chemistry, Z.H. College of Engineering & Technology, Aligarh Muslim University, Aligarh, 202002, Uttar Pradesh, India.

<sup>b</sup>School of Basic Sciences, Indian Institute of Technology Mandi, Kamand, 175005, Himachal Pradesh, India.

\*Corresponding author

## Content

**Table S1.** Characteristic FT-IR bands of pure components (NAA, 2-AP, 2-A-4,6-DMP, 2,4,6-TAP) and their cocrystals/salt (NAA-2-AP, NAA-2-A-4,6-DMP and (NAA)<sup>-</sup>(2,4,6-TAP)<sup>+</sup>)

**Table S2.** Percent contribution of strong and weak interactions in crystal packing of starting materials and all the three reported cocrystal/salt.

**Figure S1.** FTIR spectrum (500–4000 cm<sup>-1</sup>) of starting materials and ground mixture of (a) NAA-2-AP (b) NAA-2A-4,6-DMP (c) (NAA)<sup>-</sup>(2,4,6-TAP)<sup>+</sup>.

**Figure S2.** PXRD patterns of starting materials and ground mixtures of (a) NAA-2-AP (b) NAA-2A-4,6-DMP (c) (NAA)<sup>-</sup>(2,4,6-TAP)<sup>+</sup>

**Figure S3.** Graphical comparison of weak interactions among starting materials and all the three reported cocrystals/salts.

**Figure S4.** A view of Hirshfeld surface mapped over curvedness for (a) NAA-2-AP (b) NAA-2A-4,6-DMP (c) (NAA)<sup>-</sup>(2,4,6-TAP)<sup>+</sup>.

**Figure S5.** A view of Hirshfeld surface mapped over shape-index for (a) NAA-2-AP (b) NAA-2A-4,6-DMP (c) (NAA)<sup>-</sup>(2,4,6-TAP)<sup>+</sup>.

**Figure S6.** A view of Hirshfeld surface mapped over calculated electrostatic potential in the range -0.077 to +0.056 atomic units for (a) NAA-2-AP (b) NAA-2A-4,6-DMP (c) (NAA)<sup>-</sup>(2,4,6-TAP)<sup>+</sup>.

**Figure S7.** Colour-coded total interaction energies calculated for (a) NAA-2-AP (b) NAA-2A-4,6-DMP (c) (NAA)<sup>-</sup>(2,4,6-TAP)<sup>+</sup>. The individual electrostatic, polarization, dispersion and exchange-repulsion energies with scale factors of 1.057, 0.740, 0.871 and 0.618, respectively are also shown.

**Table S1**

Characteristic FT-IR bands of pure components (NAA, 2-AP, 2-A-4,6-DMP, 2,4,6-TAP) and their cocrystals/salt ((NAA)<sup>-</sup>(2,4,6-TAP)<sup>+</sup>)

| Sample                                      | Wavenumber (in cm <sup>-1</sup> ) |                       |                             |                       |                             |
|---------------------------------------------|-----------------------------------|-----------------------|-----------------------------|-----------------------|-----------------------------|
|                                             | C=O stretching (Acid)             | C-O stretching (Acid) | N-H stretching (Pyrimidine) | O-H stretching (Acid) | C=N stretching (Pyrimidine) |
| NAA                                         | 1691                              | 1216                  | ×                           | 3051                  | ×                           |
| 2-AP                                        | ×                                 | ×                     | 3326                        | ×                     | 1557                        |
| 2-A-4,6-DMP                                 | ×                                 | ×                     | 3406                        | ×                     | 1595                        |
| 2,4,6-TAP                                   | ×                                 | ×                     | 3314                        | ×                     | 1575                        |
| NAA-2-AP                                    | 1714                              | 1200                  | 3340                        | 3175                  | 1562                        |
| NAA-2-A-4,6-DMP                             | 1662                              | 1170                  | 3333                        | 3162                  | 1590                        |
| (NAA) <sup>-</sup> (2,4,6-TAP) <sup>+</sup> | 1377                              | 1377                  | 3329                        | ×                     | 1545                        |

**Table S2**

Percent contribution\* of strong and weak interactions in crystal packing of starting materials and all the three reported cocrystal/salt.

\*Calculated using *CrystalExplorer17*

| Compound                                    | Strong interactions (% contribution) |       |       | Weak interactions (% contribution) |       |       |       |       |       |       |       |       |
|---------------------------------------------|--------------------------------------|-------|-------|------------------------------------|-------|-------|-------|-------|-------|-------|-------|-------|
|                                             | N...H                                | O...H | Total | H...H                              | C...H | C...N | C...O | C...C | N...O | N...N | O...O | Total |
| NAA                                         | ×                                    | 21.9  | 21.9  | 43.5                               | 32.8  | ×     | 0.4   | 1.0   | ×     | ×     | 0.5   | 78.2  |
| 2-AP                                        | 34.1                                 | ×     | 34.1  | 42.6                               | 17.9  | 2.8   | ×     | 1.7   | ×     | 1     | ×     | 66    |
| 2-A-4,6-DMP                                 | 23.1                                 | ×     | 23.1  | 62.9                               | 6.3   | 2.7   | ×     | 5     | ×     | 0.0   | ×     | 76.9  |
| 2,4,6-TAP                                   | 29.4                                 | ×     | 29.4  | 46.1                               | 13.4  | 4.6   | ×     | 2.6   | ×     | 3.9   | ×     | 70.6  |
| NAA-2-AP                                    | 25.7                                 | 10    | 35.7  | 39.1                               | 23.9  | 0.5   | 0     | 0.3   | 0.4   | 0     | 0     | 64.2  |
| NAA-2-A-4,6-DMP                             | 13.9                                 | 13.6  | 27.5  | 49                                 | 14    | 5     | 0     | 3.2   | 0     | 1.2   | 0     | 72.4  |
| (NAA) <sup>-</sup> (2,4,6-TAP) <sup>+</sup> | 20.6                                 | 17.3  | 37.9  | 39.6                               | 17.6  | 0.9   | 1.1   | 1.9   | 1.1   | 0.0   | 0.0   | 62.2  |

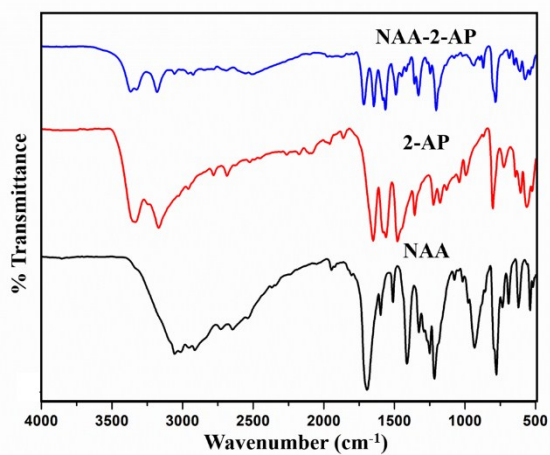

(a)

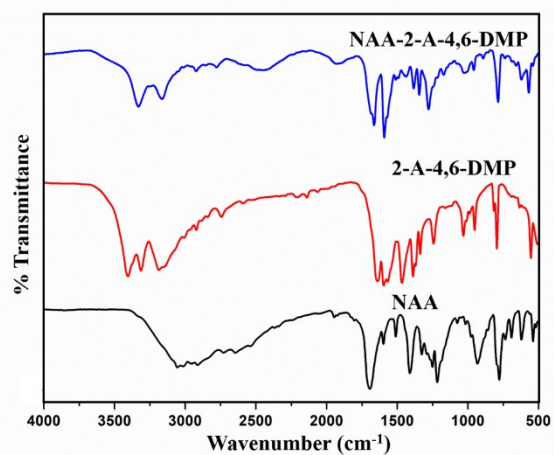

(b)

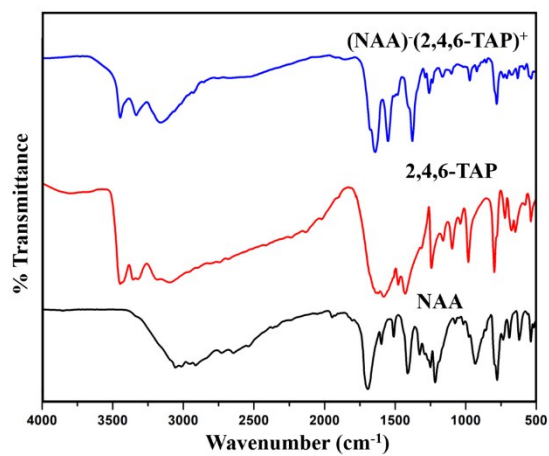

(c)

Figure S1. FTIR spectrum (500–4000 cm<sup>-1</sup>) of starting materials and ground mixture of (a) NAA-2-AP (b) NAA-2A-4,6-DMP (c) (NAA)(2,4,6-TAP)<sup>+</sup>.

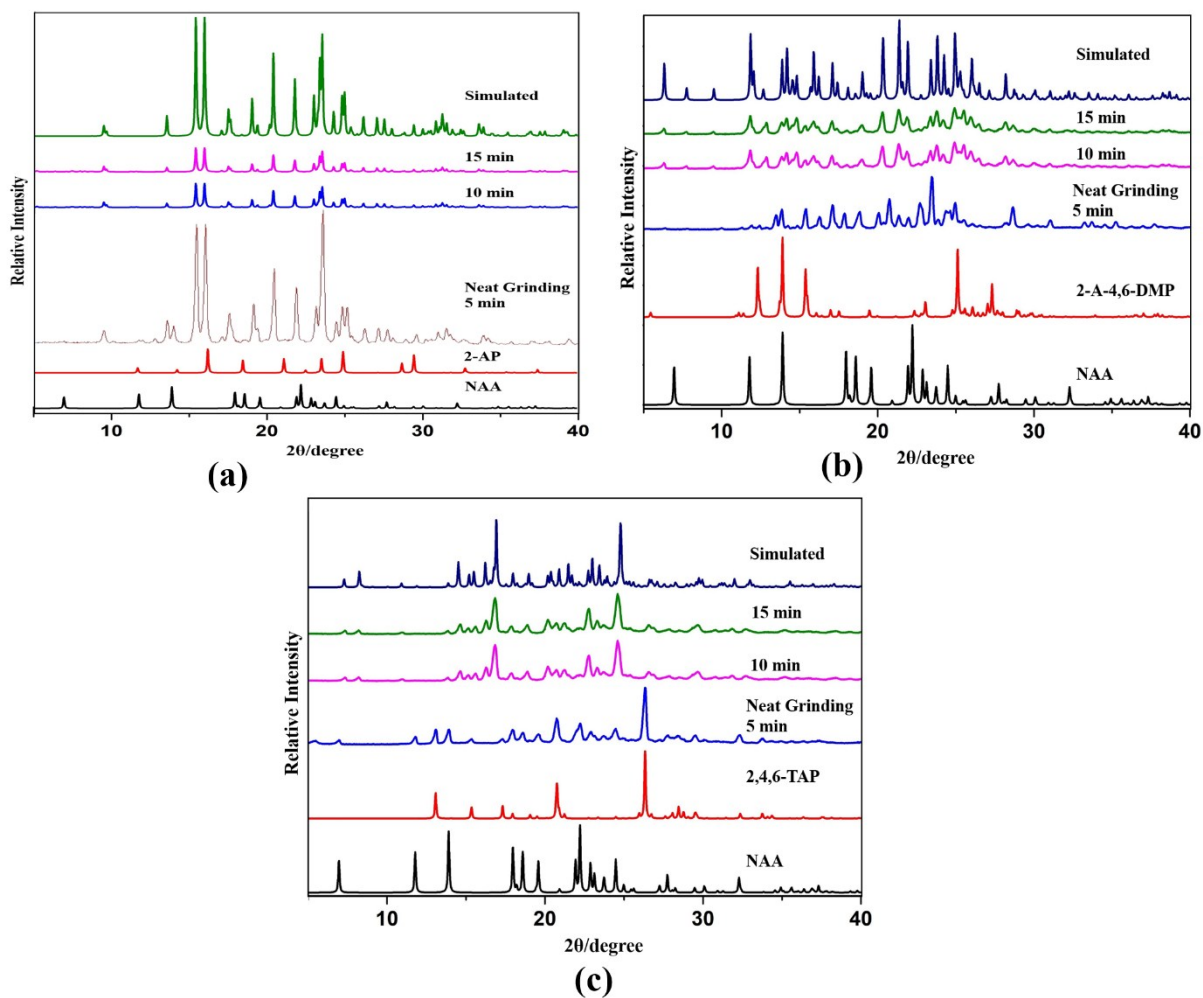

Figure S2. PXRD patterns of starting materials and ground mixtures of (a) NAA-2-AP (b) NAA-2A-4,6-DMP (c) (NAA)-(2,4,6-TAP)<sup>+</sup>.

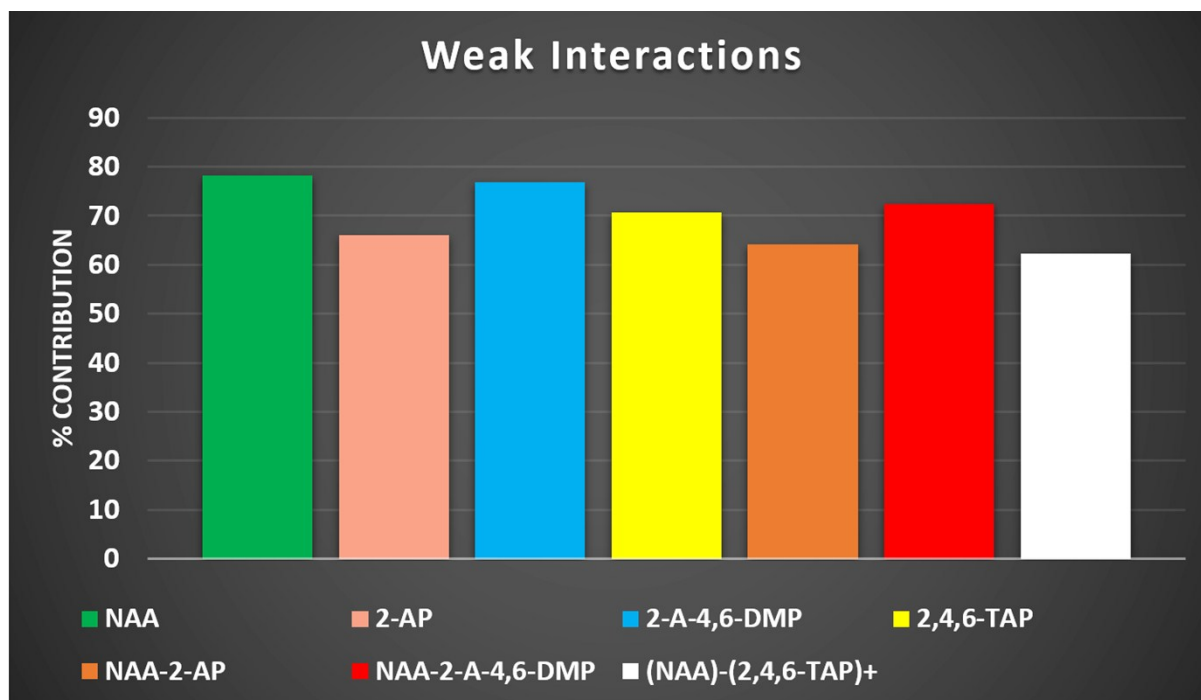

Figure S3. Graphical comparison of weak interactions among starting materials and all the three reported cocrystals/salts.

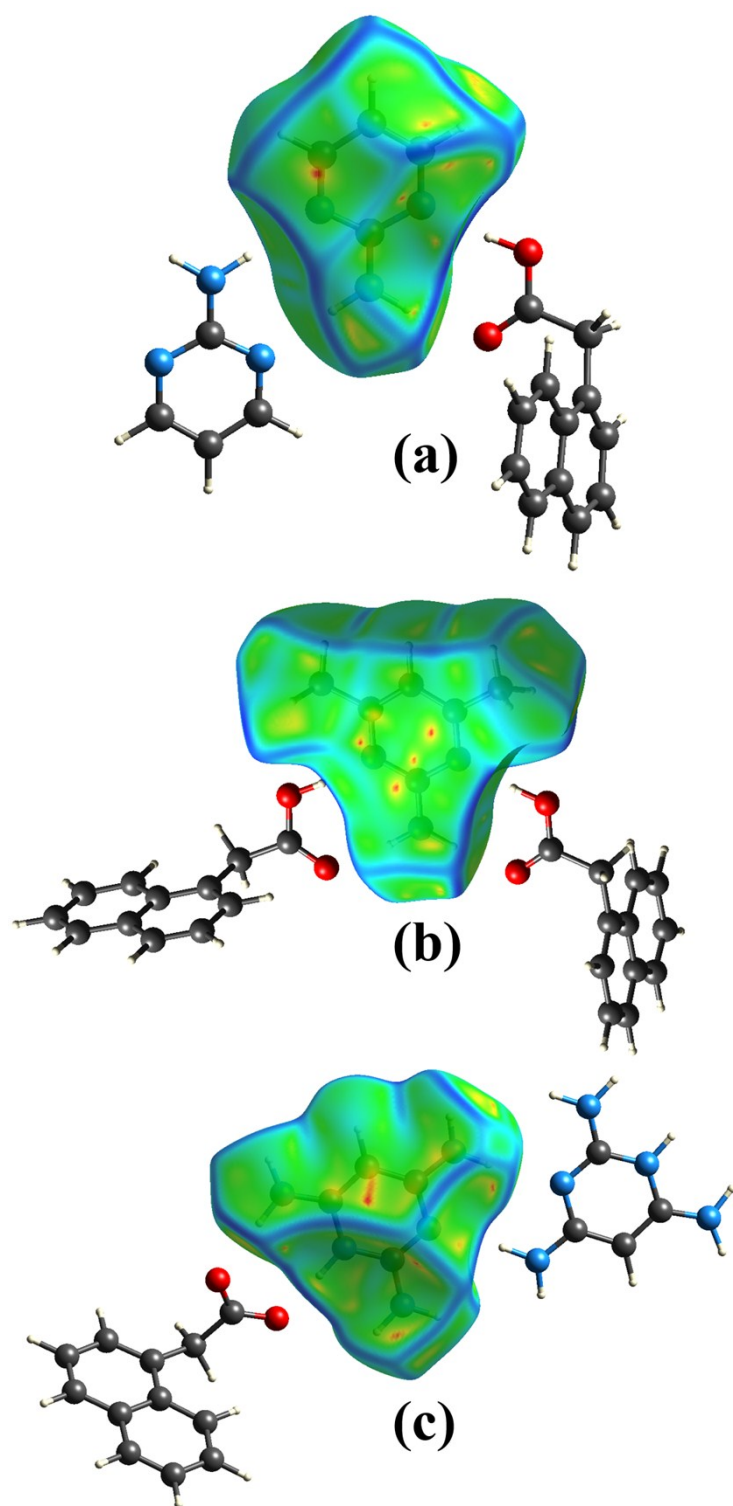

Figure S4. A view of Hirshfeld surface mapped over curvedness for (a) NAA-2-AP (b) NAA-2A-4,6-DMP (c) (NAA)-(2,4,6-TAP)<sup>+</sup>. The flat region indicates  $\pi \cdots \pi$  stacking interactions.

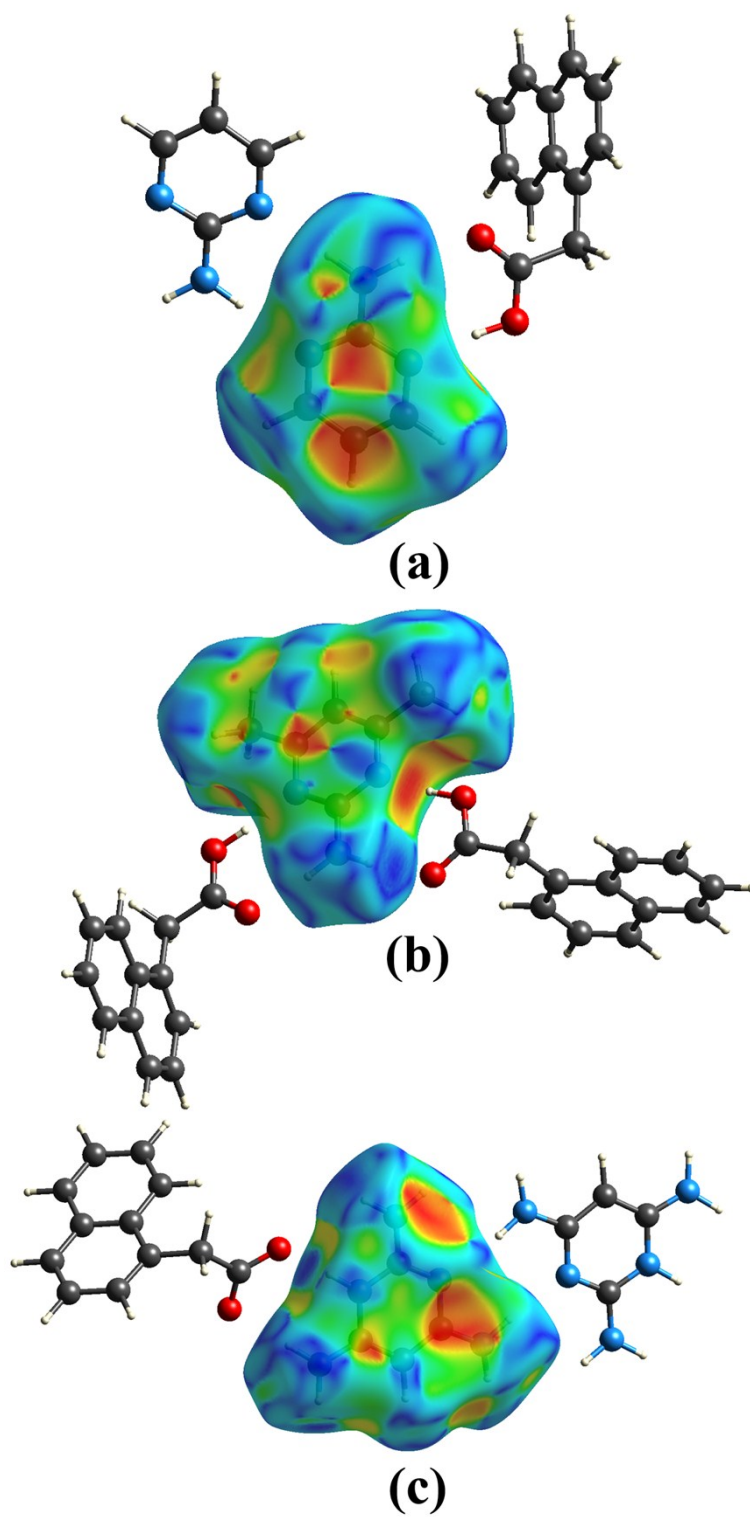

Figure S5. A view of Hirshfeld surface mapped over shape-index for (a) NAA-2-AP (b) NAA-2A-4,6-DMP (c) (NAA)-(2,4,6-TAP)<sup>+</sup>. The red and blue triangles indicate the presence of C—H $\cdots$  $\pi$  interaction and  $\pi\cdots\pi$  stacking.

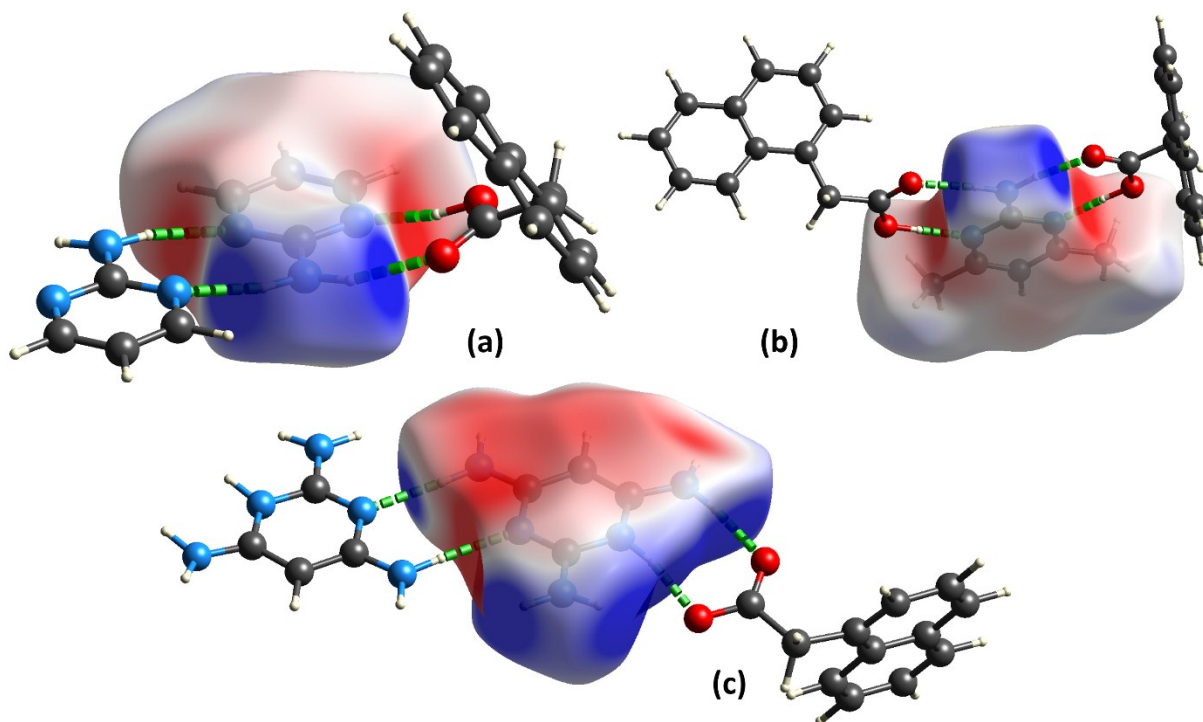

Figure S6. A view of Hirshfeld surface mapped over calculated electrostatic potential in the range  $-0.077$  to  $+0.056$  atomic units for (a) NAA-2-AP (b) NAA-2A-4,6-DMP (c) (NAA)<sup>-</sup>(2,4,6-TAP)<sup>+</sup>. The blue and red regions represent positive and negative electrostatic potential respectively.



|  | N | Symop      | R    | Electron Density | E_ele | E_pol | E_dis | E_rep | E_tot |
|--|---|------------|------|------------------|-------|-------|-------|-------|-------|
|  | 1 | -          | 6.48 | B3LYP/6-31G(d,p) | -98.0 | -21.8 | -15.0 | 107.0 | -66.7 |
|  | 1 | -x, -y, -z | 5.49 | B3LYP/6-31G(d,p) | -57.2 | -12.5 | -14.2 | 57.0  | -46.8 |
|  | 1 | -          | 6.45 | B3LYP/6-31G(d,p) | -2.8  | -0.5  | -15.9 | 11.7  | -9.9  |
|  | 1 | -          | 7.69 | B3LYP/6-31G(d,p) | -4.2  | -0.6  | -7.5  | 8.2   | -6.2  |
|  | 1 | -          | 5.81 | B3LYP/6-31G(d,p) | -6.3  | -0.8  | -18.2 | 15.6  | -13.4 |

(a)

|  | N | Symop      | R    | Electron Density | E_ele  | E_pol | E_dis | E_rep | E_tot |
|--|---|------------|------|------------------|--------|-------|-------|-------|-------|
|  | 1 | -          | 7.44 | B3LYP/6-31G(d,p) | -117.2 | -27.6 | -19.0 | 138.3 | -75.5 |
|  | 1 | -          | 7.21 | B3LYP/6-31G(d,p) | -116.8 | -27.3 | -18.6 | 139.1 | -74.0 |
|  | 1 | -          | 7.43 | B3LYP/6-31G(d,p) | -0.1   | -0.4  | -4.8  | 0.5   | -4.2  |
|  | 1 | -x, -y, -z | 3.81 | B3LYP/6-31G(d,p) | -1.1   | -1.8  | -33.3 | 14.3  | -22.6 |
|  | 1 | -          | 6.05 | B3LYP/6-31G(d,p) | -6.5   | -0.7  | -22.2 | 19.4  | -14.7 |

(b)

|  | N | Symop      | R    | Electron Density | E_ele | E_pol | E_dis | E_rep | E_tot |
|--|---|------------|------|------------------|-------|-------|-------|-------|-------|
|  | 1 | -          | 7.29 | B3LYP/6-31G(d,p) | -76.2 | -13.4 | -15.0 | 125.0 | -26.4 |
|  | 1 | -          | 7.20 | B3LYP/6-31G(d,p) | -16.6 | -5.2  | -10.0 | 24.8  | -14.8 |
|  | 1 | -          | 7.23 | B3LYP/6-31G(d,p) | -6.4  | -2.4  | -14.9 | 10.8  | -14.9 |
|  | 1 | -x, -y, -z | 6.34 | B3LYP/6-31G(d,p) | -43.7 | -15.0 | -18.4 | 65.0  | -33.1 |
|  | 1 | -          | 5.68 | B3LYP/6-31G(d,p) | -11.9 | -4.9  | -20.7 | 15.8  | -24.5 |

(c)

Figure S7. Colour-coded total interaction energies calculated for (a) NAA-2-AP (b) NAA-2-A-4,6-DMP (c) (NAA)<sup>-</sup>(2,4,6-TAP)<sup>+</sup>. The individual electrostatic, polarization, dispersion and exchange-repulsion energies with scale factors of 1.057, 0.740, 0.871 and 0.618, respectively are also shown.
